# Supplementary material for: Effect of intra-articular corticosteroid injections for knee osteoarthritis on the rates of subsequent knee replacement and post-operative outcomes: a national cohort study of England
Source: Springer Nature journal article supplement (doi:10.1186/s12916-025-04000-6), 2025-04-06
Supplement: MOESM1 [file 12916_2025_4000_MOESM1_ESM.pdf]

## **Additional File 1: Supplementary Tables and Figures**

| <b>Table S1: Read terms used to identify osteoarthritis cohorts and exposure to intra-articular corticosteroid injection</b> |                                                          |
|------------------------------------------------------------------------------------------------------------------------------|----------------------------------------------------------|
| <b>Readcode</b>                                                                                                              | <b>Readterm</b>                                          |
| <b><u>KNEE OSTEOARTHRITIS</u></b>                                                                                            |                                                          |
| N05z611                                                                                                                      | Knee osteoarthritis NOS                                  |
| N053611                                                                                                                      | Patellofemoral osteoarthritis                            |
| N05zL00                                                                                                                      | Osteoarthritis NOS, of knee                              |
| N072100                                                                                                                      | Degenerative lesion of articular cartilage of knee       |
| Nyu2511                                                                                                                      | [X] Unilateral primary gonarthrosis                      |
| N051B00                                                                                                                      | Primary gonarthrosis, bilateral                          |
| Nyu2500                                                                                                                      | [X] Other primary gonarthrosis                           |
| Nyu2811                                                                                                                      | [X] Unilateral secondary gonarthrosis                    |
| Nyu2800                                                                                                                      | [X] Other secondary gonarthrosis                         |
| Nyu2700                                                                                                                      | [X] Other secondary gonarthrosis, bilateral              |
| N052A00                                                                                                                      | Post-traumatic gonarthrosis, bilateral                   |
| N052C00                                                                                                                      | Post-traumatic gonarthrosis, unilateral                  |
| N052600                                                                                                                      | Localised, secondary osteoarthritis of the lower leg     |
| N05z600                                                                                                                      | Osteoarthritis NOS, of the lower leg                     |
| N051600                                                                                                                      | Localised, primary osteoarthritis of the lower leg       |
| N053600                                                                                                                      | Localised osteoarthritis, unspecified, of the lower leg  |
| N054600                                                                                                                      | Oligoarticular osteoarthritis, unspecified, of lower leg |
| N05zM00                                                                                                                      | Osteoarthritis NOS, of tibio-fibular joint               |
| <b><u>INTRA-ARTICULAR CORTICOSTEROID INJECTION</u></b>                                                                       |                                                          |
| 7K6Z700                                                                                                                      | Injection of steroid into knee joint                     |
| 7K6ZE00                                                                                                                      | Injection of Lederspan into knee joint                   |
| 7K6ZB00                                                                                                                      | Injection of hydrocortisone acetate into knee joint      |
| 7K6ZJ00                                                                                                                      | Injection of steroid into hip joint                      |
| 7K6Z200                                                                                                                      | Injection of therapeutic substance into joint            |
| 7K6Z300                                                                                                                      | Injection into joint NEC                                 |
| 7L19100                                                                                                                      | Injection of steroid for local action NEC                |
| 7L19000                                                                                                                      | Injection of triamcinolone for local action              |
| 7L19E00                                                                                                                      | Injection of triamcinolone                               |
| 7K6ZK00                                                                                                                      | Intra-articular injection                                |
| 7L11900                                                                                                                      | Ultrasound guided steroid injection                      |

**Table S2: Selected characteristics of patients included in secondary propensity score analysis (N=6,425)**

| Variable                              | Non-IACI <sup>1</sup> use<br>during follow-up<br>(%) | Use of IACI <sup>1</sup><br>during follow-up<br>(%) | SMD <sup>2</sup> |
|---------------------------------------|------------------------------------------------------|-----------------------------------------------------|------------------|
| Age in years: mean (S.D.)             | 67.3 (12.2)                                          | 67.3 (12.3)                                         | 0.00             |
| Female                                | 59.7%                                                | 60.4%                                               | 0.00             |
| Least deprived                        | 24.0%                                                | 24.0%                                               | 0.00             |
| Less deprived                         | 21.6%                                                | 20.6%                                               | 0.00             |
| Mid deprived                          | 19.0%                                                | 20.8%                                               | 0.03             |
| More deprived                         | 17.2%                                                | 17.5%                                               | 0.00             |
| Most deprived                         | 18.1%                                                | 17.0%                                               | -0.03            |
| BMI: <20 kg/m <sup>2</sup>            | 0.8%                                                 | 0.7%                                                | 0.00             |
| BMI 20<25 kg/m <sup>2</sup>           | 18.7%                                                | 19.7%                                               | 0.01             |
| BMI 25<30 kg/m <sup>2</sup>           | 35.1%                                                | 35.5%                                               | -0.01            |
| BMI 30<35 kg/m <sup>2</sup>           | 27.0%                                                | 26.3%                                               | 0.01             |
| BMI 35<40 kg/m <sup>2</sup>           | 11.8%                                                | 11.1%                                               | -0.02            |
| BMI ≥40 kg/m <sup>2</sup>             | 6.5%                                                 | 6.7%                                                | 0.00             |
| Current drinker                       | 78.0%                                                | 77.6%                                               | 0.00             |
| Current smoker                        | 11.1%                                                | 11.2%                                               | -0.01            |
| Charlson =1                           | 7.9%                                                 | 7.9%                                                | 0.00             |
| Charlson =2                           | 12.5%                                                | 12.4%                                               | -0.02            |
| Charlson ≥3                           | 11.3%                                                | 12.5%                                               | 0.02             |
| Cancer                                | 8.5%                                                 | 8.7%                                                | 0.01             |
| Cerebrovascular disease               | 2.6%                                                 | 3.2%                                                | 0.02             |
| Chronic obstructive pulmonary disease | 4.7%                                                 | 5.1%                                                | 0.01             |
| Diabetes                              | 11.7%                                                | 12.1%                                               | 0.01             |
| Fracture                              | 5.5%                                                 | 5.1%                                                | -0.01            |
| Ischemic heart disease                | 7.3%                                                 | 6.4%                                                | -0.01            |
| Lower respiratory tract infection     | 25.0%                                                | 23.8%                                               | -0.02            |
| Hyperlipidemia                        | 10.8%                                                | 10.0%                                               | -0.01            |
| Hypertension                          | 22.4%                                                | 22.8%                                               | 0.00             |
| Osteoporosis                          | 2.8%                                                 | 2.9%                                                | 0.00             |
| Chronic renal failure                 | 11.5%                                                | 12.4%                                               | 0.00             |
| Antiarrhythmics                       | 6.4%                                                 | 6.5%                                                | 0.00             |
| Antidepressants                       | 33.3%                                                | 34.2%                                               | 0.00             |
| Anticonvulsants                       | 10.6%                                                | 11.5%                                               | 0.02             |
| Oral glucocorticoids                  | 16.8%                                                | 16.9%                                               | 0.00             |
| NSAIDs oral                           | 64.4%                                                | 64.4%                                               | 0.00             |
| Opioids (uncombined)                  | 24.3%                                                | 24.3%                                               | 0.00             |
| Opioid-nonopioid combinations         | 57.0%                                                | 56.1%                                               | -0.02            |
| Proton pump inhibitors                | 50.3%                                                | 49.1%                                               | -0.02            |
| Statins                               | 42.2%                                                | 40.8%                                               | -0.02            |
| Hormone replacement therapy           | 6.4%                                                 | 7.2%                                                | 0.00             |
| Physiotherapy                         | 28.6%                                                | 29.0%                                               | -0.02            |

<sup>1</sup> IACI: Intra-articular corticosteroid injection<sup>2</sup> SMD: Standardised Mean Difference. SMD values closer to zero indicate better balance. Values greater than +/- 0.1 indicate non-balance.

| Table S3: Description of outcome events in instrumental variable analysis |                                             |                                       |              |              |                                         |                                       |              |              |
|---------------------------------------------------------------------------|---------------------------------------------|---------------------------------------|--------------|--------------|-----------------------------------------|---------------------------------------|--------------|--------------|
| Procedure                                                                 | Preference for non-use of IACI <sup>1</sup> |                                       |              |              | Preference for single IACI <sup>1</sup> |                                       |              |              |
|                                                                           | Number outcome events                       | Incidence rate (per 100 person years) |              |              | Number outcome events                   | Incidence rate (per 100 person years) |              |              |
|                                                                           |                                             | Estimate                              | lower 95% CI | upper 95% CI |                                         | Estimate                              | lower 95% CI | upper 95% CI |
| <b><u>1-year follow-up</u></b>                                            |                                             |                                       |              |              |                                         |                                       |              |              |
| Arthroscopy                                                               | 475                                         | 2.4                                   | 2.2          | 2.6          | 369                                     | 2.7                                   | 2.4          | 3.0          |
| Debridement                                                               | 401                                         | 2.0                                   | 1.8          | 2.2          | 304                                     | 2.3                                   | 2.0          | 2.5          |
| Replacement                                                               | 1024                                        | 5.1                                   | 4.8          | 5.4          | 604                                     | 4.4                                   | 4.1          | 4.8          |
| <b><u>5-year follow-up</u></b>                                            |                                             |                                       |              |              |                                         |                                       |              |              |
| Arthroscopy                                                               | 952                                         | 1.2                                   | 1.1          | 1.3          | 607                                     | 1.2                                   | 1.1          | 1.3          |
| Debridement                                                               | 805                                         | 1.0                                   | 0.9          | 1.1          | 532                                     | 1.0                                   | 0.9          | 1.1          |
| Replacement                                                               | 2359                                        | 3.0                                   | 2.9          | 3.2          | 1371                                    | 2.7                                   | 2.6          | 2.9          |

<sup>1</sup> IACI: Intra-articular corticosteroid injection

| Table S4: Description of outcome events in propensity-score matched analysis (n=6,425) |                              |                                       |              |              |                                 |                                       |              |              |         |                                 |                                       |              |              |         |
|----------------------------------------------------------------------------------------|------------------------------|---------------------------------------|--------------|--------------|---------------------------------|---------------------------------------|--------------|--------------|---------|---------------------------------|---------------------------------------|--------------|--------------|---------|
| Procedure                                                                              | Non-use of IACI <sup>1</sup> |                                       |              |              | Single use of IACI <sup>1</sup> |                                       |              |              |         | Repeat use of IACI <sup>1</sup> |                                       |              |              |         |
|                                                                                        | Number outcome events        | Incidence rate (per 100 person years) |              |              | Number outcome events           | Incidence rate (per 100 person years) |              |              |         | Number outcome events           | Incidence rate (per 100 person years) |              |              |         |
|                                                                                        |                              | Estimate                              | lower 95% CI | upper 95% CI |                                 | Estimate                              | lower 95% CI | upper 95% CI | P-value |                                 | Estimate                              | lower 95% CI | upper 95% CI | P-value |
| 1-year follow-up                                                                       |                              |                                       |              |              |                                 |                                       |              |              |         |                                 |                                       |              |              |         |
| Arthroscopy                                                                            | 139                          | 4.7                                   | 3.9          | 5.5          | 62                              | 5.1                                   | 3.8          | 6.3          | 0.56    | 8                               | 3.9                                   | 1.2          | 6.6          | 0.60    |
| Debridement                                                                            | 112                          | 3.8                                   | 3.1          | 4.5          | 60                              | 4.9                                   | 3.6          | 6.1          | 0.13    | 4                               | 1.9                                   | 0.0          | 3.8          | 0.18    |
| Replacement                                                                            | 217                          | 7.4                                   | 6.4          | 8.4          | 88                              | 7.1                                   | 5.7          | 8.6          | 0.52    | 13                              | 6.3                                   | 2.9          | 9.7          | 0.50    |
| 5-year follow-up                                                                       |                              |                                       |              |              |                                 |                                       |              |              |         |                                 |                                       |              |              |         |
| Arthroscopy                                                                            | 426                          | 2.0                                   | 1.8          | 2.2          | 146                             | 2.0                                   | 1.7          | 2.4          | 0.28    | 48                              | 1.8                                   | 1.3          | 2.3          | 0.88    |
| Debridement                                                                            | 366                          | 1.7                                   | 1.5          | 1.9          | 134                             | 1.8                                   | 1.5          | 2.2          | 0.14    | 45                              | 1.6                                   | 1.1          | 2.1          | 0.83    |
| Replacement                                                                            | 802                          | 4.0                                   | 3.7          | 4.2          | 387                             | 5.7                                   | 5.2          | 6.3          | <0.001  | 192                             | 7.6                                   | 6.5          | 8.7          | <0.001  |

<sup>1</sup> IACI: Intra-articular corticosteroid injection

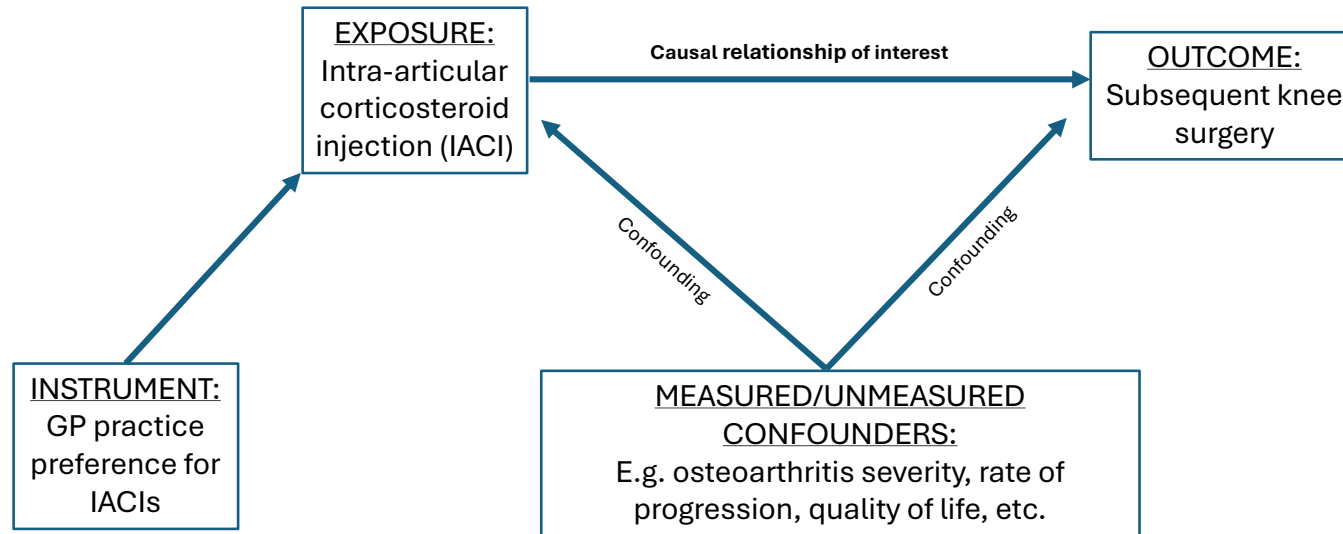

Figure S1: Conceptual framework illustrating main instrumental variable (IV) model. INSTRUMENT is used to isolate causal covariation in EXPOSURE -> OUTCOME, independent of measured/unmeasured confounded covariation. As such, the IV analysis estimates the causal effects of EXPOSURE on OUTCOME for people whose EXPOSURE is determined by the INSTRUMENT. Assumptions include that the INSTRUMENT predicts EXPOSURE, is not associated with CONFOUNDERS, and is not associated with OUTCOME except through the EXPOSURE.

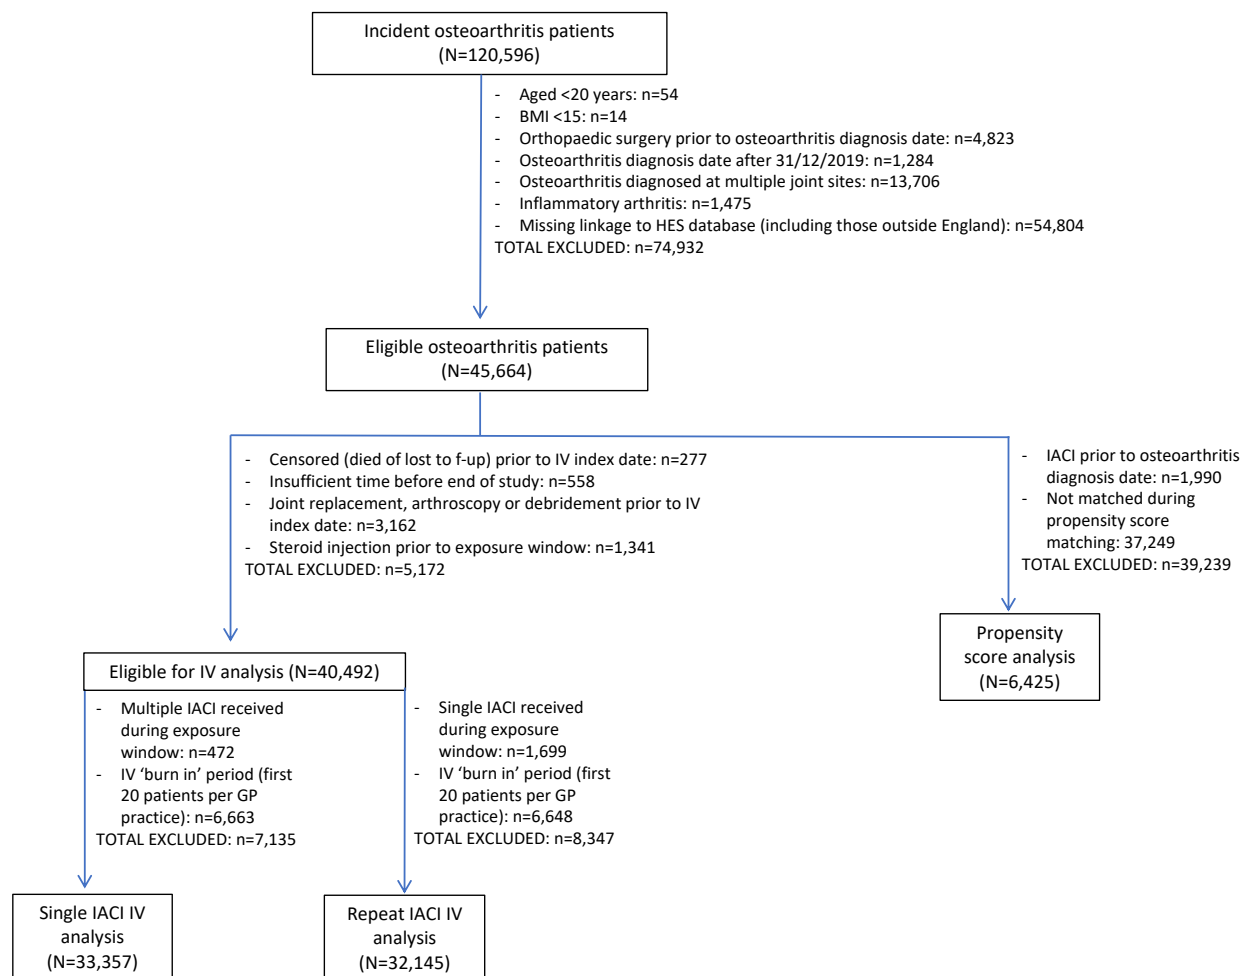

**Figure S2: Population Flow Diagram**

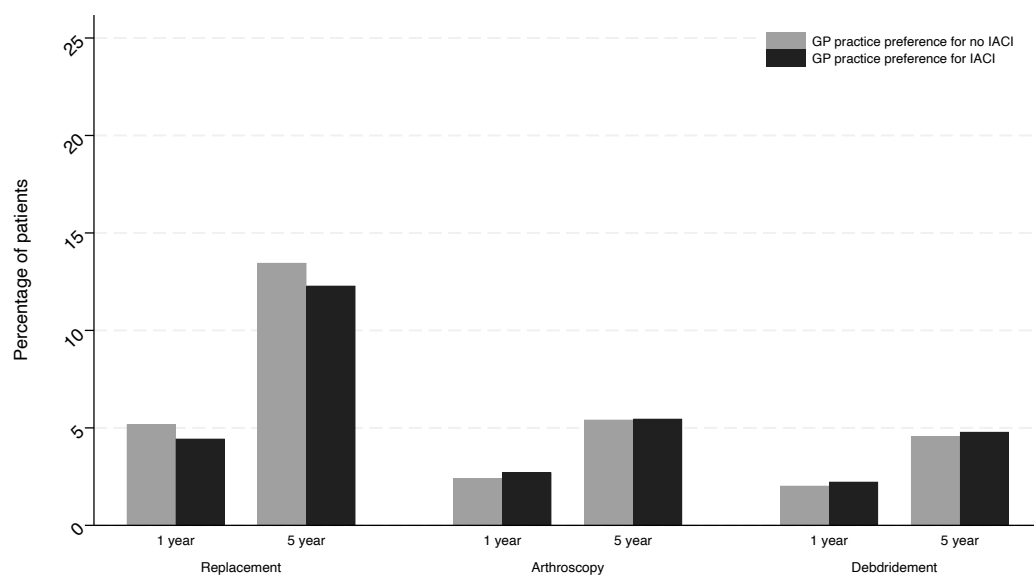

**Figure S3: Crude cumulative incidence of outcome events during follow-up in Instrumental Variable (IV) analyses: stratified by preference for IACI**

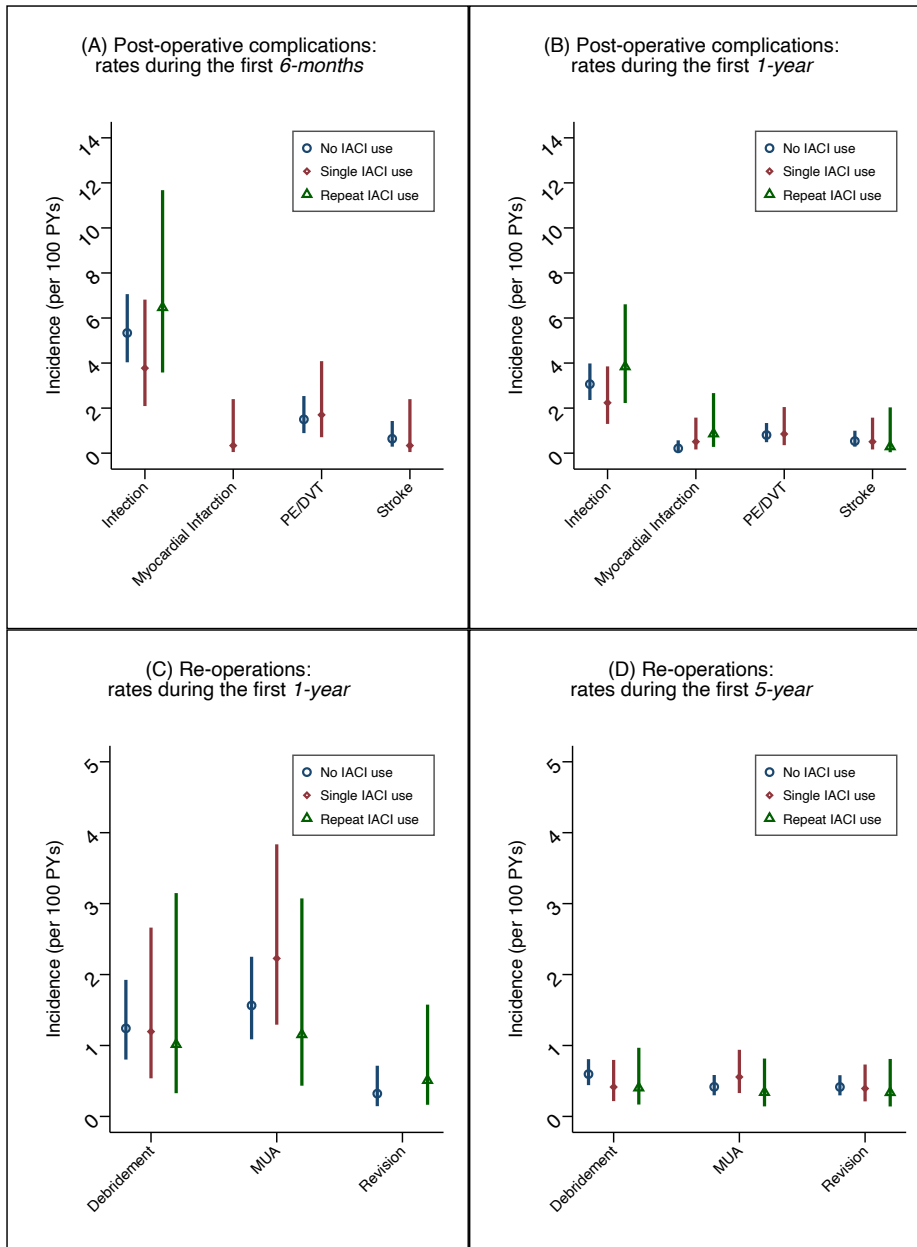

**Figure S4: Incidence rates of individual post-operative complication and re-operation events during follow-up in propensity-score analyses**
